# Supplementary material
Source: PubMed Central journal article supplement (PMC3127601)
Supplement: supp_77_11_3685__1.pdf [file supp_77_11_3685__1.pdf]

Table S1. Primers used in this study

| Primers | Primer sequences (5' to 3') | Locations in EDL933 genome | Purposes                                     |
|---------|-----------------------------|----------------------------|----------------------------------------------|
| Csg_F1  | acaatcccgggacttctacc        | 1546676..1546695           | Sequencing <i>csgB</i> to <i>csgD</i> region |
| Csg_F2  | ccgttgatatgaggccagtt        | 1547105..1547124           | Sequencing <i>csgB</i> to <i>csgD</i> region |
| Csg_F3  | tcggtgtagtccttctca          | 1547769..1547788           | Sequencing <i>csgB</i> to <i>csgD</i> region |
| Csg_F4  | tgcgcaagaaggtagtagca        | 1548388..1548407           | Sequencing <i>csgB</i> to <i>csgD</i> region |
| Csg_F5  | agatgttggtcagggctcag        | 1548911..1548930           | Sequencing <i>csgB</i> to <i>csgD</i> region |
| Csg_R1  | attcgcagcagaccattctc        | 1549556..1549575           | Sequencing <i>csgB</i> to <i>csgD</i> region |
| Csg_R2  | tgagttacgttgacgtgga         | 1549071..1549090           | Sequencing <i>csgB</i> to <i>csgD</i> region |
| Csg_R3  | agcaccttgcgaaatactgg        | 1548480..1548499           | Sequencing <i>csgB</i> to <i>csgD</i> region |
| Csg_R4  | gtcgtgattgctgcgata          | 1547878..1547896           | Sequencing <i>csgB</i> to <i>csgD</i> region |
| Csg_R5  | acagctctcttcgacacct         | 1547333..1547353           | Sequencing <i>csgB</i> to <i>csgD</i> region |

Table S2. EcO157 curli variants and their MLVA types

| Variants <sup>a</sup> | genotype | MLVA type <sup>b</sup> |           |           |           |           |           |           |             |             |             |             |
|-----------------------|----------|------------------------|-----------|-----------|-----------|-----------|-----------|-----------|-------------|-------------|-------------|-------------|
|                       |          | Vhec<br>1              | Vhec<br>2 | Vhec<br>3 | Vhec<br>4 | Vhec<br>5 | Vhec<br>6 | Vhec<br>7 | O157<br>-17 | O157-<br>19 | O157<br>-25 | O157-<br>37 |
| RM6011R               | 163      | 16                     | 9         | 11        | <b>17</b> | 7         | 9         | 9         | 4           | 7           | 5           | 6           |
| RM6011W               | 834      | 16                     | 9         | 11        | <b>18</b> | 7         | 9         | 9         | 4           | 7           | 5           | 6           |
| RM6069R               | 163      | 16                     | 9         | 11        | <b>17</b> | 7         | 9         | 9         | 4           | 7           | 5           | 6           |
| RM6069W               | 361      | 16                     | 9         | 11        | <b>16</b> | 7         | 9         | 9         | 4           | 7           | 5           | 6           |
| RM6049R               | 163      | 16                     | 9         | 11        | 17        | 7         | 9         | 9         | 4           | 7           | 5           | 6           |
| RM6049W               | 163      | 16                     | 9         | 11        | 17        | 7         | 9         | 9         | 4           | 7           | 5           | 6           |
| RM6654R               | 163      | 16                     | 9         | 11        | 17        | 7         | 9         | 9         | 4           | 7           | 5           | 6           |
| RM6654W               | 163      | 16                     | 9         | 11        | 17        | 7         | 9         | 9         | 4           | 7           | 5           | 6           |
| RM6067R               | 163      | 16                     | 9         | 11        | 17        | 7         | 9         | 9         | 4           | 7           | 5           | 6           |
| RM6067W               | 163      | 16                     | 9         | 11        | 17        | 7         | 9         | 9         | 4           | 7           | 5           | 6           |
| RM9994R               | 163      | 16                     | 9         | 11        | 17        | 7         | 9         | 9         | 4           | 7           | 5           | 6           |
| RM9994W               | 163      | 16                     | 9         | 11        | 17        | 7         | 9         | 9         | 4           | 7           | 5           | 6           |
| RM9998R               | 163      | 16                     | 9         | 11        | 17        | 7         | 9         | 9         | 4           | 7           | 5           | 6           |
| RM9998W               | 163      | 16                     | 9         | 11        | 17        | 7         | 9         | 9         | 4           | 7           | 5           | 6           |
| RM10000R              | 163      | 16                     | 9         | 11        | 17        | 7         | 9         | 9         | 4           | 7           | 5           | 6           |
| RM10000W              | 163      | 16                     | 9         | 11        | 17        | 7         | 9         | 9         | 4           | 7           | 5           | 6           |
| RM6535R               | 280      | 18                     | 11        | 13        | 16        | 7         | 9         | 10        | 6           | 6           | 5           | 8           |
| RM6535W               | 280      | 18                     | 11        | 13        | 16        | 7         | 9         | 10        | 6           | 6           | 5           | 8           |
| RM6416R               | 874      | 19                     | 11        | <b>9</b>  | 16        | 7         | 9         | 10        | 6           | 6           | 5           | 8           |
| RM6416W               | 214      | 19                     | 11        | <b>12</b> | 16        | 7         | 9         | 10        | 6           | 6           | 5           | 8           |
| RM6607R               | 365      | 19                     | 11        | 11        | 14        | 5         | 9         | 11        | 7           | 6           | 5           | 8           |
| RM6607W               | 365      | 19                     | 11        | 11        | 14        | 5         | 9         | 11        | 7           | 6           | 5           | 8           |
| RM6608R               | 365      | 19                     | 11        | 11        | 14        | 5         | 9         | 11        | 7           | 6           | 5           | 8           |
| RM6608W               | 365      | 19                     | 11        | 11        | 14        | 5         | 9         | 11        | 7           | 6           | 5           | 8           |

<sup>a</sup>The suffix “R” and “W” in the variant name refer to C<sup>+</sup> and C<sup>-</sup> variant, respectively. <sup>b</sup>Curli variants derived from the same strain carrying different numbers of TR are shown in bold.
